# Supplementary material for: Matrix metalloproteinase 7 in diagnosis and differentiation of pulmonary arterial hypertension
Source: PubMed Central journal article supplement — Pulm Circ. 2019 Dec 27;9(4):2045894019895414. doi: 10.1177/2045894019895414 (PMC6935882; doi:10.1177/2045894019895414), 2019-12-27
Supplement: PUL895414_Supplemental_Material.pdf [file PUL895414_Supplemental_Material.pdf]

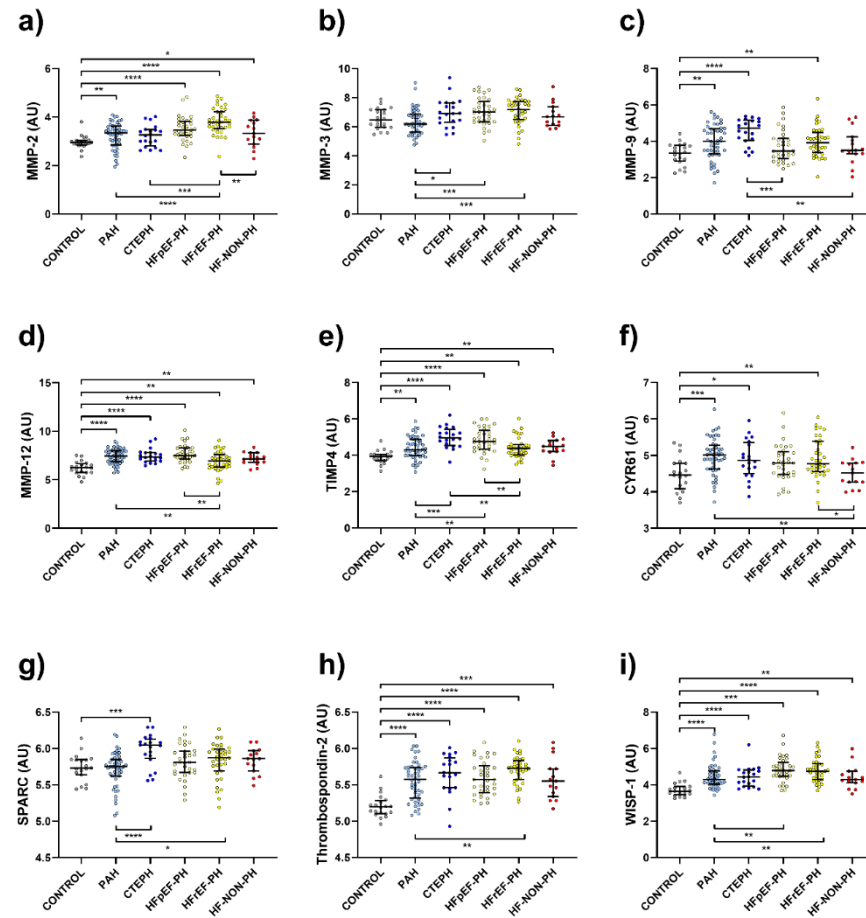

**Supplementary figure 1.** Protein levels in disease groups and controls. PAH: pulmonary arterial hypertension; CTEPH: chronic thromboembolic pulmonary hypertension(PH); HFpEF-PH: PH due to heart failure (HF) with preserved ejection fraction (EF); HFrEF-PH: PH due to HF with reduced EF; HF-NON-PH: HF without PH; MMP: Matrix metalloproteinase; TIMP-4; Tissue inhibitor of metalloproteinases 4; CYR61: protein CYR61; WISP-1: WNT1-inducible-signaling pathway protein 1; AU: arbitrary units; Significant difference after FDR analysis depicted as \* =  $p < 0.021$  \*\* =  $p < 0.01$ ; \*\*\* =  $p < 0.001$ ; \*\*\*\* =  $p < 0.0001$ .

**Supplementary table 1. Multiple comparison p-values in all groups**

| COMPARISON             | MMP-2              | MMP-3          | MMP-7              | MMP-9              | MMP-12             | TIMP4              | CYR61          | SPARC              | Thrombo-spondin-2  | WISP-1             |
|------------------------|--------------------|----------------|--------------------|--------------------|--------------------|--------------------|----------------|--------------------|--------------------|--------------------|
| CONTROL vs. PAH        | <b>0.0098*</b>     | 0.4027         | <b>&lt;0.0001*</b> | <b>0.0029*</b>     | <b>&lt;0.0001*</b> | <b>0.0012*</b>     | <b>0.0003*</b> | 0.8655             | <b>&lt;0.0001*</b> | <b>&lt;0.0001*</b> |
| CONTROL vs. CTEPH      | 0.0639             | 0.1572         | <b>&lt;0.0001*</b> | <b>&lt;0.0001*</b> | <b>&lt;0.0001*</b> | <b>&lt;0.0001*</b> | <b>0.0118*</b> | <b>0.0009*</b>     | <b>&lt;0.0001*</b> | <b>0.0003*</b>     |
| CONTROL vs. HFpEF-PH   | <b>&lt;0.0001*</b> | 0.0595         | <b>&lt;0.0001*</b> | 0.1275             | <b>&lt;0.0001*</b> | <b>&lt;0.0001*</b> | 0.0342         | 0.1548             | <b>&lt;0.0001*</b> | <b>&lt;0.0001*</b> |
| CONTROL vs. HFrEF-PH   | <b>&lt;0.0001*</b> | 0.0228         | <b>&lt;0.0001*</b> | <b>0.0065*</b>     | <b>0.0065*</b>     | <b>0.0022*</b>     | <b>0.0041*</b> | 0.0788             | <b>&lt;0.0001*</b> | <b>&lt;0.0001*</b> |
| CONTROL vs. HF-NON-PH  | <b>0.0137*</b>     | 0.5286         | <b>&lt;0.0001*</b> | 0.1439             | <b>0.003*</b>      | <b>0.0037*</b>     | 0.9124         | 0.1673             | <b>0.0003*</b>     | <b>0.0017*</b>     |
| PAH vs. CTEPH          | 0.7037             | <b>0.0118*</b> | <b>0.0027*</b>     | 0.0217             | 0.9648             | <b>0.0007*</b>     | 0.4853         | <b>&lt;0.0001*</b> | 0.137              | 0.8567             |
| PAH vs. HFpEF-PH       | 0.0592             | <b>0.0008*</b> | <b>&lt;0.0001*</b> | 0.1119             | 0.3624             | <b>0.0049*</b>     | 0.0905         | 0.0439             | 0.5394             | <b>0.0084*</b>     |
| PAH vs. HFrEF-PH       | <b>&lt;0.0001*</b> | <b>0.0001*</b> | <b>0.0029*</b>     | 0.8843             | <b>0.0088*</b>     | 0.9629             | 0.4302         | <b>0.0139*</b>     | <b>0.007*</b>      | <b>0.0078*</b>     |
| PAH vs. HF-NON-PH      | 0.5999             | 0.1388         | <b>0.008*</b>      | 0.3232             | 0.2736             | 0.6632             | <b>0.0013*</b> | 0.0771             | 0.8814             | 0.931              |
| CTEPH vs. HFpEF-PH     | 0.0625             | 0.7598         | 0.7198             | <b>0.0006*</b>     | 0.4424             | 0.3399             | 0.4866         | <b>0.0202*</b>     | 0.3644             | 0.0533             |
| CTEPH vs. HFrEF-PH     | <b>0.0001*</b>     | 0.5009         | 0.6059             | 0.0211             | 0.0426             | <b>0.001*</b>      | 0.9705         | 0.0431             | 0.4761             | 0.0524             |
| CTEPH vs. HF-NON-PH    | 0.4529             | 0.4968         | 0.9633             | <b>0.0082*</b>     | 0.3608             | 0.0227             | 0.0244         | 0.0836             | 0.3032             | 0.8293             |
| HFpEF-PH vs. HFrEF-PH  | 0.025              | 0.6749         | 0.3083             | 0.1743             | <b>0.0012*</b>     | <b>0.0073*</b>     | 0.3924         | 0.7074             | 0.0586             | 0.9873             |
| HFpEF-PH vs. HF-NON-PH | 0.3833             | 0.306          | 0.7062             | 0.8289             | 0.0889             | 0.1031             | 0.0663         | 0.8292             | 0.7612             | 0.046              |
| HFrEF-PH vs. HF-NON-PH | <b>0.0083*</b>     | 0.1719         | 0.6767             | 0.3973             | 0.4096             | 0.6509             | <b>0.0116*</b> | 0.9383             | 0.0733             | 0.0454             |

Table depict p-values of Kruskal Wallis multiple comparison analysis of all groups. P-values marked with \* (bold) are considered significant ( $P < 0.021$ ) after FDR analysis. PAH: Pulmonary Arterial Hypertension; CTEPH: Chronic Thromboembolic Pulmonary Hypertension; HFpEF-PH: PH due to heart failure (HF) with preserved ejection fraction (EF); HFrEF-PH: PH due to HF with reduced EF; HF-NON-PH: HF without PH. MMP: Matrix metalloproteinase; TIMP-4: Tissue inhibitor of metalloproteinases 4; WISP-1: WNT1-inducible-signaling pathway protein 1.
